# Supplementary material for: Machine learning and density functional theory simulation of the electronic structural properties for novel quaternary semiconductors
Source: Royal Society of Chemistry journal article supplement (doi:10.1039/d2cp04244d), 2023-01-01
Supplement: d2cp04244d2.pdf [file d2cp04244d2.pdf]

# **Machine Learning and Density Functional Theory Simulation of Electronic Structural Properties for Novel Quaternary Semiconductors**

Mengwei Gao<sup>1</sup>, Bo Cai<sup>1,2\*</sup>, Gaoyu Liu<sup>1</sup>, Lili Xu<sup>1</sup>, Shengli Zhang<sup>1\*</sup> and Haibo Zeng<sup>1\*</sup>

1. MIIT Key Laboratory of Advanced Display Materials and Devices, School of Materials Science and Engineering, Nanjing University of Science and Technology, Nanjing 210094, China. E-mail: [zhangslvip@njust.edu.cn](mailto:zhangslvip@njust.edu.cn); [zeng.haibo@njust.edu.cn](mailto:zeng.haibo@njust.edu.cn)
2. State Key Laboratory of Organic Electronics and Information Displays & Institute of Advanced Materials (IAM), Nanjing University of Posts & Telecommunications, 9 Wenyuan Road, Nanjing 210023, China. E-mail: [iambcai@njupt.edu.cn](mailto:iambcai@njupt.edu.cn)

# CONTENT

|                                                                                                                                                                                                                                                                          |    |
|--------------------------------------------------------------------------------------------------------------------------------------------------------------------------------------------------------------------------------------------------------------------------|----|
| Supplementary Tables .....                                                                                                                                                                                                                                               | 3  |
| <b>Table S1. Elemental properties used to compute elemental-property-based attributes.</b><br>.....                                                                                                                                                                      | 3  |
| <b>Table S2. The materials whose bandgap values in the range of 1.6 ~ 3.2 eV, which are<br/>    predicted by the ML training model.</b> .....                                                                                                                            | 4  |
| Supplementary Figures .....                                                                                                                                                                                                                                              | 13 |
| <b>Fig. S1. The Pearson correlation heat map of the initial 145 feature descriptors.</b> .....                                                                                                                                                                           | 13 |
| <b>Fig. S2. Validation set fitting results of the bandgaps predicted by ML and real DFT.</b><br>.....                                                                                                                                                                    | 14 |
| <b>Fig. S3. The electronic band structure calculated with HSE and the Projected density<br/>    of states for <math>\text{Ag}_2\text{InGaS}_4</math>.</b> .....                                                                                                          | 14 |
| <b>Fig. S4. The electronic band structure calculated with HSE and the Projected density<br/>    of states for <math>\text{Ag}_2\text{ZnSnS}_4</math>.</b> .....                                                                                                          | 15 |
| <b>Fig. S5. The electronic band structure calculated with HSE and the Projected density<br/>    of states for <math>\text{AgZn}_2\text{GaS}_4</math>.</b> .....                                                                                                          | 15 |
| <b>Fig. S6. The electronic band structure calculated with HSE and the Projected density<br/>    of states for <math>\text{AgZn}_2\text{InS}_4</math>.</b> .....                                                                                                          | 16 |
| <b>Fig. S7. The configuration coordinate diagram describing the luminescence center of<br/>    <math>\text{Ag}_2\text{InGaS}_4</math>, <math>\text{Ag}_2\text{ZnSnS}_4</math>, <math>\text{AgZn}_2\text{GaS}_4</math>, <math>\text{AgZn}_2\text{InS}_4</math>.</b> ..... | 16 |

# Supplementary Tables

**Table S1.** Elemental properties used to compute elemental-property-based attributes. Elemental property is taken from that dataset available with the Wolfram programming language, unless otherwise specified.

|                                                                 |                                                               |                                                                                |                                                                           |
|-----------------------------------------------------------------|---------------------------------------------------------------|--------------------------------------------------------------------------------|---------------------------------------------------------------------------|
| Atomic Number<br>mean/maxdiff/dev/<br>max/min/most              | Mendelev<br>Number<br>mean/maxdiff/dev/<br>max/min/most       | Atomic Weight<br>mean/maxdiff/dev/<br>max/min/most                             | Melting<br>Temperature<br>mean/maxdiff/dev/<br>max/min/most               |
| Column<br>mean/maxdiff/dev/<br>max/min/most                     | Row<br>mean/maxdiff/dev/<br>max/min/most                      | Covalent Radius<br>mean/maxdiff/dev/<br>max/min/most                           | Electronegativity<br>mean/maxdiff/dev/<br>max/min/most                    |
| s Valence<br>Electrons<br>mean/maxdiff/dev/<br>max/min/most     | p Valence<br>Electrons<br>mean/maxdiff/dev/<br>max/min/most   | d Valence<br>Electrons<br>mean/maxdiff/dev/<br>max/min/most                    | f Valence<br>Electrons<br>mean/maxdiff/dev/<br>max/min/most               |
| Total Valence<br>Electrons<br>mean/maxdiff/dev/<br>max/min/most | Unfilled s states<br>mean/maxdiff/dev/<br>max/min/most        | Unfilled p states<br>mean/maxdiff/dev/<br>max/min/most                         | Unfilled d states<br>mean/maxdiff/dev/<br>max/min/most                    |
| Unfilled f states<br>mean/maxdiff/dev/<br>max/min/most          | Total Unfilled<br>states<br>mean/maxdiff/dev/<br>max/min/most | Specific Volume<br>of 0 K Ground<br>state<br>mean/maxdiff/dev/<br>max/min/most | Bandap Energy of<br>0 K Ground state<br>mean/maxdiff/dev/<br>max/min/most |
| Frac s/p/d/f<br>Valence                                         | Ionic Char<br>mean/max                                        | Magnetic Moment<br>(per atom) of 0 K<br>Ground state<br>mean/maxdiff/dev/      | Space Group<br>Number of 0 K<br>Group state<br>mean/maxdiff/dev/          |

|  |  |              |              |
|--|--|--------------|--------------|
|  |  | max/min/most | max/min/most |
|--|--|--------------|--------------|

**Table S2.** In 2180 quaternary semiconductors, the materials whose bandgap values in the range of 1.6 ~ 3.2 eV, which are predicted by the ML training model.

|                                     |                                     |                                     |                                     |
|-------------------------------------|-------------------------------------|-------------------------------------|-------------------------------------|
| Na <sub>2</sub> AuGaS <sub>4</sub>  | Li <sub>2</sub> PdHfTe <sub>4</sub> | Fe <sub>2</sub> LiAuS <sub>4</sub>  | Co <sub>2</sub> LiInS <sub>4</sub>  |
| Li <sub>2</sub> PdHfSe <sub>4</sub> | Li <sub>2</sub> PtCrSe <sub>4</sub> | Na <sub>2</sub> AgMoTe <sub>4</sub> | Fe <sub>2</sub> KInSe <sub>4</sub>  |
| K <sub>2</sub> PdSiSe <sub>4</sub>  | Na <sub>2</sub> PtCrSe <sub>4</sub> | Fe <sub>2</sub> PdZnS <sub>4</sub>  | Mg <sub>2</sub> LiAlO <sub>4</sub>  |
| K <sub>2</sub> FeSiSe <sub>4</sub>  | K <sub>2</sub> NaMoTe <sub>4</sub>  | Na <sub>2</sub> MgCrTe <sub>4</sub> | K <sub>2</sub> PtSnTe <sub>4</sub>  |
| Na <sub>2</sub> PdHfSe <sub>4</sub> | Ni <sub>2</sub> MgPdO <sub>4</sub>  | Mg <sub>2</sub> CoZnS <sub>4</sub>  | K <sub>2</sub> AuGaTe <sub>4</sub>  |
| K <sub>2</sub> AuGaS <sub>4</sub>   | Ni <sub>2</sub> AgAlO <sub>4</sub>  | Ag <sub>2</sub> MgCrSe <sub>4</sub> | Ag <sub>2</sub> ZnSiO <sub>4</sub>  |
| K <sub>2</sub> PtGeS <sub>4</sub>   | Ag <sub>2</sub> MgSiO <sub>4</sub>  | Pd <sub>2</sub> LiGaO <sub>4</sub>  | Na <sub>2</sub> AuAlTe <sub>4</sub> |
| Na <sub>2</sub> MgSiSe <sub>4</sub> | K <sub>2</sub> AuGaSe <sub>4</sub>  | K <sub>2</sub> GaInTe <sub>4</sub>  | Na <sub>2</sub> PtSiTe <sub>4</sub> |
| Li <sub>2</sub> PtCrS <sub>4</sub>  | Ag <sub>2</sub> MgZrO <sub>4</sub>  | Ag <sub>2</sub> FeZrS <sub>4</sub>  | Ni <sub>2</sub> CoZnO <sub>4</sub>  |
| Na <sub>2</sub> MgZrSe <sub>4</sub> | Na <sub>2</sub> ZnSnSe <sub>4</sub> | Na <sub>2</sub> PdZrTe <sub>4</sub> | Co <sub>2</sub> KAlS <sub>4</sub>   |
| Na <sub>2</sub> ZnHfSe <sub>4</sub> | Ag <sub>2</sub> NaMoO <sub>4</sub>  | Ni <sub>2</sub> MgFeO <sub>4</sub>  | Zn <sub>2</sub> FeCoO <sub>4</sub>  |
| Li <sub>2</sub> MgZrSe <sub>4</sub> | Li <sub>2</sub> ZnHfTe <sub>4</sub> | Co <sub>2</sub> MgNiO <sub>4</sub>  | Fe <sub>2</sub> KAlS <sub>4</sub>   |
| K <sub>2</sub> AlInSe <sub>4</sub>  | Ag <sub>2</sub> NaCrSe <sub>4</sub> | Li <sub>2</sub> PtHfTe <sub>4</sub> | Zn <sub>2</sub> LiAlS <sub>4</sub>  |
| K <sub>2</sub> PtCrS <sub>4</sub>   | Co <sub>2</sub> NaAuS <sub>4</sub>  | K <sub>2</sub> PdSnTe <sub>4</sub>  | Li <sub>2</sub> PdGeTe <sub>4</sub> |
| Li <sub>2</sub> PtHfS <sub>4</sub>  | K <sub>2</sub> MgSiTe <sub>4</sub>  | Na <sub>2</sub> NiGeTe <sub>4</sub> | Li <sub>2</sub> FeGeTe <sub>4</sub> |
| K <sub>2</sub> MgCrSe <sub>4</sub>  | Co <sub>2</sub> KAuS <sub>4</sub>   | Na <sub>2</sub> CoGeTe <sub>4</sub> | Zn <sub>2</sub> FeNiO <sub>4</sub>  |
| K <sub>2</sub> MgTiSe <sub>4</sub>  | Co <sub>2</sub> AgAlO <sub>4</sub>  | K <sub>2</sub> FeZrTe <sub>4</sub>  | Fe <sub>2</sub> CoZnO <sub>4</sub>  |
| Li <sub>2</sub> AuInO <sub>4</sub>  | Ag <sub>2</sub> MgTiO <sub>4</sub>  | Pd <sub>2</sub> KAlO <sub>4</sub>   | Mg <sub>2</sub> LiAlSe <sub>4</sub> |
| Li <sub>2</sub> PtSnO <sub>4</sub>  | Co <sub>2</sub> MgPdO <sub>4</sub>  | Ni <sub>2</sub> CoPdS <sub>4</sub>  | K <sub>2</sub> AuAlTe <sub>4</sub>  |
| Na <sub>2</sub> ZnSiSe <sub>4</sub> | K <sub>2</sub> PtGeSe <sub>4</sub>  | Ni <sub>2</sub> MgCoO <sub>4</sub>  | Na <sub>2</sub> MgSnTe <sub>4</sub> |
| Li <sub>2</sub> MgSiSe <sub>4</sub> | Ag <sub>2</sub> MgCO <sub>4</sub>   | Ag <sub>2</sub> FeGeO <sub>4</sub>  | Ni <sub>2</sub> NaAlS <sub>4</sub>  |
| K <sub>2</sub> ZnHfSe <sub>4</sub>  | Na <sub>2</sub> GaSbS <sub>4</sub>  | Co <sub>2</sub> MgPdSe <sub>4</sub> | Co <sub>2</sub> LiInO <sub>4</sub>  |
| K <sub>2</sub> AuSbO <sub>4</sub>   | Ag <sub>2</sub> PdHfO <sub>4</sub>  | Ag <sub>2</sub> MgTiSe <sub>4</sub> | Zn <sub>2</sub> MgCoO <sub>4</sub>  |
| Li <sub>2</sub> AuSbO <sub>4</sub>  | Ag <sub>2</sub> NaNbO <sub>4</sub>  | K <sub>2</sub> PdGeTe <sub>4</sub>  | Zn <sub>2</sub> CoNiO <sub>4</sub>  |
| K <sub>2</sub> NiHfSe <sub>4</sub>  | Li <sub>2</sub> KMoTe <sub>4</sub>  | Ag <sub>2</sub> ZnZrS <sub>4</sub>  | Co <sub>2</sub> LiGaS <sub>4</sub>  |
| K <sub>2</sub> CoHfSe <sub>4</sub>  | Na <sub>2</sub> LiMoTe <sub>4</sub> | Mg <sub>2</sub> NiZnS <sub>4</sub>  | Fe <sub>2</sub> LiAuTe <sub>4</sub> |

|                |                |                |                |
|----------------|----------------|----------------|----------------|
| $K_2MgSnSe_4$  | $Ag_2KNbSe_4$  | $Fe_2CoPdS_4$  | $Zn_2MgNiO_4$  |
| $Na_2NiSiSe_4$ | $Ag_2MgHfSe_4$ | $Mg_2FeZnS_4$  | $Zn_2AgAlSe_4$ |
| $K_2NaCrSe_4$  | $Zn_2AgAlS_4$  | $Pd_2MgFeSe_4$ | $Mg_2NaGaS_4$  |
| $K_2FeHfSe_4$  | $Ag_2MgCS_4$   | $Na_2ZnCrTe_4$ | $Li_2MgSiTe_4$ |
| $Li_2ZnSiSe_4$ | $Ag_2MgTiS_4$  | $Na_2FeGeTe_4$ | $Mg_2NaAlS_4$  |
| $Li_2NaCrSe_4$ | $Mg_2AgGaS_4$  | $Pd_2LiAlS_4$  | $Li_2CoTiTe_4$ |
| $K_2PtSnS_4$   | $Li_2PtTiSe_4$ | $Na_2PdCrTe_4$ | $Li_2ZnCrTe_4$ |
| $K_2AuInS_4$   | $Zn_2AgAlO_4$  | $Fe_2KAuO_4$   | $Co_2LiInSe_4$ |
| $K_2PdHfSe_4$  | $K_2PdSiTe_4$  | $K_2PtTiSe_4$  | $Li_2NiGeTe_4$ |
| $Na_2AlGaSe_4$ | $Ag_2NaNbSe_4$ | $Ag_2PdGeS_4$  | $Ni_2LiInS_4$  |
| $Li_2NiZrSe_4$ | $Zn_2MgPdS_4$  | $Ag_2PdCS_4$   | $Ni_2LiGaS_4$  |
| $Li_2AlGaSe_4$ | $Ag_2PdCO_4$   | $Na_2MgSiTe_4$ | $K_2PtZrTe_4$  |
| $Na_2KCrSe_4$  | $Co_2AgAlS_4$  | $Co_2AgAlSe_4$ | $Ag_2ZnGeS_4$  |
| $Li_2FeZrSe_4$ | $K_2LiCrTe_4$  | $Na_2PdSnTe_4$ | $Ni_2KAlS_4$   |
| $K_2ZnGeSe_4$  | $K_2PtCrSe_4$  | $Na_2PdTiTe_4$ | $Co_2NiZnO_4$  |
| $Li_2CoZrSe_4$ | $Ag_2NiHfO_4$  | $Ni_2LiAuO_4$  | $Fe_2NiZnO_4$  |
| $Li_2AuInS_4$  | $Ag_2KCrO_4$   | $Fe_2LiAuO_4$  | $Co_2NaAlS_4$  |
| $Na_2MgGeSe_4$ | $Fe_2MgPdO_4$  | $Na_2NiCrTe_4$ | $Fe_2KGaS_4$   |
| $K_2NiGeSe_4$  | $Ag_2KMoSe_4$  | $Ag_2FeCrS_4$  | $Co_2FeZnO_4$  |
| $K_2LiCrSe_4$  | $Ni_2FePdO_4$  | $Ag_2CoGeO_4$  | $Co_2NaAuSe_4$ |
| $Na_2GaSbO_4$  | $Fe_2MgPdS_4$  | $Ag_2NiCrS_4$  | $Li_2NiTiTe_4$ |
| $Li_2MgGeSe_4$ | $Co_2NiPdO_4$  | $Pd_2MgCoSe_4$ | $Li_2CoGeTe_4$ |
| $Li_2PtSnS_4$  | $Li_2PtZrSe_4$ | $Pd_2KAlSe_4$  | $K_2AuSbTe_4$  |
| $Na_2PtHfS_4$  | $Ag_2LiMoO_4$  | $K_2CoTiTe_4$  | $Co_2KAlO_4$   |
| $Na_2PdSiSe_4$ | $Ni_2AgAlS_4$  | $Fe_2NaAuO_4$  | $Li_2PdSnTe_4$ |
| $Li_2ZnCS_4$   | $K_2AlGaTe_4$  | $Na_2AgCrTe_4$ | $Ag_2MgGeSe_4$ |
| $Na_2PtSnS_4$  | $Fe_2AgAlS_4$  | $Na_2CoCrTe_4$ | $K_2AlSbTe_4$  |
| $Li_2PtZrS_4$  | $Na_2KCrTe_4$  | $Fe_2NaInS_4$  | $Ni_2FeZnO_4$  |
| $Na_2AuInS_4$  | $Ni_2MgPdS_4$  | $Pd_2MgNiSe_4$ | $Li_2FeTiTe_4$ |

|                              |                              |                              |                              |
|------------------------------|------------------------------|------------------------------|------------------------------|
| $\text{Li}_2\text{PdTiSe}_4$ | $\text{Fe}_2\text{NiPdO}_4$  | $\text{Na}_2\text{FeTiTe}_4$ | $\text{Ag}_2\text{AlGaO}_4$  |
| $\text{Li}_2\text{PdSiSe}_4$ | $\text{Ag}_2\text{LiNbS}_4$  | $\text{Zn}_2\text{MgNiS}_4$  | $\text{Li}_2\text{ZnGeTe}_4$ |
| $\text{Li}_2\text{PdCSe}_4$  | $\text{K}_2\text{NiSiTe}_4$  | $\text{Ag}_2\text{NiGeO}_4$  | $\text{Co}_2\text{KAuSe}_4$  |
| $\text{Na}_2\text{CoSiSe}_4$ | $\text{Co}_2\text{MgPdS}_4$  | $\text{Na}_2\text{CoTiTe}_4$ | $\text{Li}_2\text{FeCrTe}_4$ |
| $\text{Li}_2\text{PdCrSe}_4$ | $\text{Ag}_2\text{NaCrO}_4$  | $\text{Zn}_2\text{MgCoS}_4$  | $\text{Ag}_2\text{AlGaSe}_4$ |
| $\text{Na}_2\text{FeZrSe}_4$ | $\text{K}_2\text{CoSiTe}_4$  | $\text{K}_2\text{AgCrTe}_4$  | $\text{Ag}_2\text{PdZrSe}_4$ |
| $\text{Li}_2\text{AgCrSe}_4$ | $\text{Mg}_2\text{AgAlS}_4$  | $\text{Na}_2\text{FeCrTe}_4$ | $\text{Na}_2\text{AuGaTe}_4$ |
| $\text{Li}_2\text{CoCSe}_4$  | $\text{Mg}_2\text{FePdS}_4$  | $\text{K}_2\text{PdCrTe}_4$  | $\text{K}_2\text{PtGeTe}_4$  |
| $\text{Li}_2\text{AuSbS}_4$  | $\text{Fe}_2\text{CoPdO}_4$  | $\text{Fe}_2\text{MgPdSe}_4$ | $\text{Co}_2\text{NaGaS}_4$  |
| $\text{K}_2\text{CoCrSe}_4$  | $\text{Ag}_2\text{LiCrS}_4$  | $\text{Ag}_2\text{CoCrS}_4$  | $\text{Fe}_2\text{NaAlS}_4$  |
| $\text{K}_2\text{ZnCSe}_4$   | $\text{K}_2\text{FeSiTe}_4$  | $\text{K}_2\text{NiSnTe}_4$  | $\text{Ag}_2\text{PdCrSe}_4$ |
| $\text{Na}_2\text{CoZrSe}_4$ | $\text{Mg}_2\text{PdZnS}_4$  | $\text{K}_2\text{FeCrTe}_4$  | $\text{Na}_2\text{PtGeTe}_4$ |
| $\text{Na}_2\text{AlInSe}_4$ | $\text{Ag}_2\text{CoHfO}_4$  | $\text{Na}_2\text{PdGeTe}_4$ | $\text{Ni}_2\text{NaGaS}_4$  |
| $\text{K}_2\text{AuSbS}_4$   | $\text{Mg}_2\text{CoPdS}_4$  | $\text{Fe}_2\text{CoNiS}_4$  | $\text{Ag}_2\text{ZnSiSe}_4$ |
| $\text{K}_2\text{FeZrSe}_4$  | $\text{Co}_2\text{LiAuS}_4$  | $\text{K}_2\text{FeTiTe}_4$  | $\text{Zn}_2\text{LiAlO}_4$  |
| $\text{Na}_2\text{MgCrSe}_4$ | $\text{Mg}_2\text{NiPdS}_4$  | $\text{K}_2\text{CoCrTe}_4$  | $\text{Mg}_2\text{LiGaO}_4$  |
| $\text{Li}_2\text{NiCSe}_4$  | $\text{Co}_2\text{FePdO}_4$  | $\text{Pd}_2\text{FeNiS}_4$  | $\text{Li}_2\text{CoCrTe}_4$ |
| $\text{Li}_2\text{FeCSe}_4$  | $\text{Pd}_2\text{MgNiS}_4$  | $\text{K}_2\text{CoSnTe}_4$  | $\text{Pd}_2\text{AgInS}_4$  |
| $\text{Li}_2\text{AlInSe}_4$ | $\text{Li}_2\text{AuSbSe}_4$ | $\text{Ag}_2\text{FeSiSe}_4$ | $\text{Li}_2\text{PdCTe}_4$  |
| $\text{Na}_2\text{NiZrSe}_4$ | $\text{K}_2\text{NaNbTe}_4$  | $\text{K}_2\text{NiGeTe}_4$  | $\text{Mg}_2\text{KGaSe}_4$  |
| $\text{Na}_2\text{FeSiSe}_4$ | $\text{Ag}_2\text{LiMoSe}_4$ | $\text{K}_2\text{CoGeTe}_4$  | $\text{Co}_2\text{KGaS}_4$   |
| $\text{K}_2\text{ZnZrSe}_4$  | $\text{Pd}_2\text{MgZnS}_4$  | $\text{K}_2\text{NiCrTe}_4$  | $\text{Ni}_2\text{NaAlO}_4$  |
| $\text{K}_2\text{PdSnSe}_4$  | $\text{Fe}_2\text{PdZnO}_4$  | $\text{Li}_2\text{PtCTe}_4$  | $\text{Li}_2\text{NiCrTe}_4$ |
| $\text{Li}_2\text{MgCrSe}_4$ | $\text{Ni}_2\text{PdZnO}_4$  | $\text{K}_2\text{FeGeTe}_4$  | $\text{Ni}_2\text{KAuO}_4$   |
| $\text{Li}_2\text{NiSiSe}_4$ | $\text{Ag}_2\text{LiNbO}_4$  | $\text{Pd}_2\text{NaAlSe}_4$ | $\text{Ni}_2\text{KGaS}_4$   |
| $\text{Li}_2\text{AgNbSe}_4$ | $\text{K}_2\text{MgCrTe}_4$  | $\text{Na}_2\text{NiTiTe}_4$ | $\text{Ag}_2\text{CoZrSe}_4$ |
| $\text{K}_2\text{MgHfTe}_4$  | $\text{Ag}_2\text{NiSiS}_4$  | $\text{K}_2\text{FeSnTe}_4$  | $\text{Na}_2\text{PtZrTe}_4$ |
| $\text{Li}_2\text{CoSiSe}_4$ | $\text{Pd}_2\text{AgAlO}_4$  | $\text{Ni}_2\text{MgZnS}_4$  | $\text{Li}_2\text{ZnCTe}_4$  |
| $\text{Li}_2\text{KCrSe}_4$  | $\text{Ag}_2\text{FeCrO}_4$  | $\text{Pd}_2\text{FeCoS}_4$  | $\text{Na}_2\text{GaInTe}_4$ |

|                              |                              |                              |                              |
|------------------------------|------------------------------|------------------------------|------------------------------|
| $\text{Na}_2\text{LiCrSe}_4$ | $\text{Pd}_2\text{AgAlS}_4$  | $\text{Zn}_2\text{MgFeS}_4$  | $\text{Ag}_2\text{NiZrSe}_4$ |
| $\text{K}_2\text{PdGeSe}_4$  | $\text{Ni}_2\text{CoPdO}_4$  | $\text{Ag}_2\text{PdCrO}_4$  | $\text{Ni}_2\text{LiGaO}_4$  |
| $\text{K}_2\text{NiZrSe}_4$  | $\text{Fe}_2\text{KAuSe}_4$  | $\text{Co}_2\text{FeNiS}_4$  | $\text{K}_2\text{MgCTe}_4$   |
| $\text{Li}_2\text{FeSiSe}_4$ | $\text{Ag}_2\text{CoSiS}_4$  | $\text{K}_2\text{NiTiTe}_4$  | $\text{Mg}_2\text{LiGaS}_4$  |
| $\text{K}_2\text{CoZrSe}_4$  | $\text{Zn}_2\text{FePdO}_4$  | $\text{Mg}_2\text{FeZnO}_4$  | $\text{Fe}_2\text{MgCoTe}_4$ |
| $\text{K}_2\text{NiCrSe}_4$  | $\text{Zn}_2\text{NiPdO}_4$  | $\text{Ag}_2\text{NiTiS}_4$  | $\text{Fe}_2\text{LiInSe}_4$ |
| $\text{Li}_2\text{PdZrSe}_4$ | $\text{Fe}_2\text{AgAlO}_4$  | $\text{K}_2\text{ZnCrTe}_4$  | $\text{Ag}_2\text{KCrTe}_4$  |
| $\text{Li}_2\text{AgMoSe}_4$ | $\text{Zn}_2\text{CoPdO}_4$  | $\text{Li}_2\text{AuAlTe}_4$ | $\text{Ag}_2\text{FeZrSe}_4$ |
| $\text{Na}_2\text{NiGeSe}_4$ | $\text{Co}_2\text{AgGaO}_4$  | $\text{Mg}_2\text{CoZnO}_4$  | $\text{Mg}_2\text{KAlO}_4$   |
| $\text{Na}_2\text{CoCrSe}_4$ | $\text{Ni}_2\text{AgGaO}_4$  | $\text{Li}_2\text{PtSiTe}_4$ | $\text{K}_2\text{PtCrTe}_4$  |
| $\text{Na}_2\text{PdCSe}_4$  | $\text{Pd}_2\text{MgCoS}_4$  | $\text{Li}_2\text{PtZrTe}_4$ | $\text{Li}_2\text{MgCrTe}_4$ |
| $\text{K}_2\text{GaInSe}_4$  | $\text{Ag}_2\text{PdSiS}_4$  | $\text{Mg}_2\text{NiZnO}_4$  | $\text{Li}_2\text{AlSbTe}_4$ |
| $\text{K}_2\text{PdCrSe}_4$  | $\text{Fe}_2\text{AgGaO}_4$  | $\text{K}_2\text{PdTiTe}_4$  | $\text{Mg}_2\text{NaAlO}_4$  |
| $\text{K}_2\text{PdCSe}_4$   | $\text{Fe}_2\text{KAuS}_4$   | $\text{Na}_2\text{CoSnTe}_4$ | $\text{Ag}_2\text{ZnZrSe}_4$ |
| $\text{K}_2\text{NiSnSe}_4$  | $\text{Co}_2\text{PdZnO}_4$  | $\text{Ag}_2\text{CoTiS}_4$  | $\text{Fe}_2\text{MgPtS}_4$  |
| $\text{Na}_2\text{ZnCSe}_4$  | $\text{Na}_2\text{InSbS}_4$  | $\text{Na}_2\text{NiSnTe}_4$ | $\text{Li}_2\text{MgTiTe}_4$ |
| $\text{Li}_2\text{PdGeSe}_4$ | $\text{K}_2\text{AlInTe}_4$  | $\text{Ag}_2\text{FeTiS}_4$  | $\text{Ni}_2\text{KAlO}_4$   |
| $\text{K}_2\text{CoGeSe}_4$  | $\text{Ag}_2\text{FeHfO}_4$  | $\text{Ni}_2\text{FeCoS}_4$  | $\text{Co}_2\text{NaAlSe}_4$ |
| $\text{K}_2\text{PtHfS}_4$   | $\text{Ag}_2\text{MgCrS}_4$  | $\text{Ag}_2\text{NiZrO}_4$  | $\text{Pd}_2\text{KGaSe}_4$  |
| $\text{K}_2\text{AgMoSe}_4$  | $\text{K}_2\text{MgGeTe}_4$  | $\text{Fe}_2\text{AgGaS}_4$  | $\text{Fe}_2\text{AgInS}_4$  |
| $\text{K}_2\text{NiCSe}_4$   | $\text{Fe}_2\text{NaAuSe}_4$ | $\text{Fe}_2\text{MgZnS}_4$  | $\text{Fe}_2\text{MgCoSe}_4$ |
| $\text{K}_2\text{MgCSe}_4$   | $\text{Ag}_2\text{PdSiO}_4$  | $\text{Na}_2\text{ZnSiTe}_4$ | $\text{Co}_2\text{KAlSe}_4$  |
| $\text{Na}_2\text{PdTiSe}_4$ | $\text{K}_2\text{AuSbSe}_4$  | $\text{Pd}_2\text{CoNiS}_4$  | $\text{Pd}_2\text{NaInS}_4$  |
| $\text{Na}_2\text{AgMoSe}_4$ | $\text{Ag}_2\text{LiNbSe}_4$ | $\text{Zn}_2\text{AgGaO}_4$  | $\text{K}_2\text{PtTiTe}_4$  |
| $\text{Na}_2\text{PdCrSe}_4$ | $\text{Ag}_2\text{NiTiO}_4$  | $\text{Ag}_2\text{CoSiSe}_4$ | $\text{Fe}_2\text{MgNiSe}_4$ |
| $\text{Na}_2\text{PtZrS}_4$  | $\text{Na}_2\text{PtZrSe}_4$ | $\text{Co}_2\text{MgZnS}_4$  | $\text{Ag}_2\text{PdTiSe}_4$ |
| $\text{Na}_2\text{AgNbSe}_4$ | $\text{Mg}_2\text{NiPdO}_4$  | $\text{Co}_2\text{PdZnS}_4$  | $\text{Ag}_2\text{FeHfTe}_4$ |
| $\text{Na}_2\text{NiCSe}_4$  | $\text{Ag}_2\text{CoCrO}_4$  | $\text{Co}_2\text{LiAlO}_4$  | $\text{Zn}_2\text{AgInS}_4$  |
| $\text{Na}_2\text{AuSbS}_4$  | $\text{Pd}_2\text{FeCoO}_4$  | $\text{Co}_2\text{AgGaS}_4$  | $\text{Zn}_2\text{NaAlSe}_4$ |

|                |                |                |                |
|----------------|----------------|----------------|----------------|
| $K_2FeGeSe_4$  | $Mg_2PdZnO_4$  | $Ni_2PdZnS_4$  | $Co_2KAlTe_4$  |
| $Na_2MgHfTe_4$ | $K_2InSbS_4$   | $Co_2KInS_4$   | $Fe_2NaAuTe_4$ |
| $Na_2AgCrSe_4$ | $Ag_2MgGeS_4$  | $Ag_2ZnCO_4$   | $Mg_2KInSe_4$  |
| $Na_2PdZrSe_4$ | $Mg_2FePdO_4$  | $Zn_2FePdS_4$  | $Li_2GaInTe_4$ |
| $K_2AgNbSe_4$  | $Mg_2CoPdO_4$  | $Li_2PtSnTe_4$ | $Co_2LiAlSe_4$ |
| $Li_2ZnGeSe_4$ | $Ag_2MgZrSe_4$ | $Li_2AuInTe_4$ | $Co_2AgInS_4$  |
| $Li_2NiGeSe_4$ | $Ag_2FeTiO_4$  | $Ag_2KMoTe_4$  | $K_2InSbTe_4$  |
| $Li_2ZnZrSe_4$ | $Ag_2LiCrSe_4$ | $Ag_2CoZrO_4$  | $Fe_2LiAlSe_4$ |
| $K_2FeCrSe_4$  | $Ag_2CoTiO_4$  | $K_2ZnSnTe_4$  | $Mg_2KAlSe_4$  |
| $K_2PdZrSe_4$  | $Na_2MgZrTe_4$ | $Ag_2ZnTiO_4$  | $Ni_2LiAlSe_4$ |
| $Na_2PdGeSe_4$ | $Pd_2MgFeS_4$  | $Ni_2AgGaS_4$  | $Pd_2KGaS_4$   |
| $Li_2PtTiS_4$  | $Ag_2FeSiS_4$  | $Zn_2CoPdS_4$  | $Na_2PtCrTe_4$ |
| $Na_2AuSbO_4$  | $Ag_2AlGaS_4$  | $Ni_2MgPdSe_4$ | $Li_2FeSiTe_4$ |
| $Li_2FeGeSe_4$ | $Ag_2ZnSiS_4$  | $Ag_2NiSiSe_4$ | $Ni_2LiInO_4$  |
| $Li_2CoCrSe_4$ | $Li_2NaMoTe_4$ | $Li_2PtCrTe_4$ | $Ag_2MgSnS_4$  |
| $K_2FeTiSe_4$  | $Li_2AlSbSe_4$ | $Zn_2NiPdS_4$  | $Pd_2FeCoSe_4$ |
| $Li_2CoGeSe_4$ | $Ag_2LiCrO_4$  | $Li_2PtGeTe_4$ | $Ag_2PtCrS_4$  |
| $Li_2ZnCrSe_4$ | $Mg_2AgAlO_4$  | $Na_2FeSnTe_4$ | $K_2GaSbTe_4$  |
| $K_2CoCSe_4$   | $Na_2InSbSe_4$ | $Ag_2FeZrO_4$  | $Na_2PtTiTe_4$ |
| $K_2NiTiSe_4$  | $Li_2InSbSe_4$ | $Zn_2KAlS_4$   | $Zn_2LiAlSe_4$ |
| $Li_2FeCrSe_4$ | $Mg_2AgGaO_4$  | $Ag_2ZnCrS_4$  | $Mg_2NaGaSe_4$ |
| $Na_2ZnZrSe_4$ | $Fe_2LiAuSe_4$ | $Ni_2FeCoO_4$  | $Ag_2CoCrSe_4$ |
| $K_2CoTiSe_4$  | $Ag_2ZnHfS_4$  | $Li_2AuGaTe_4$ | $Pd_2LiInO_4$  |
| $Na_2ZnGeSe_4$ | $Ag_2FeCS_4$   | $K_2PtHfTe_4$  | $Pt_2LiAuSe_4$ |
| $K_2ZnCrSe_4$  | $Li_2NaCrTe_4$ | $Ag_2MgGeO_4$  | $Co_2MgFeSe_4$ |
| $Na_2CoCSe_4$  | $Mg_2CoNiS_4$  | $Ag_2ZnTiS_4$  | $Ni_2AgInS_4$  |
| $Li_2NiCrSe_4$ | $Na_2PtTiSe_4$ | $Co_2LiGaO_4$  | $Mg_2LiGaSe_4$ |
| $Na_2FeCSe_4$  | $Fe_2NaInO_4$  | $Ni_2NaAuO_4$  | $Ag_2ZnCrSe_4$ |
| $Li_2PtCSe_4$  | $Ag_2NiHfS_4$  | $Ni_2AgAlSe_4$ | $Fe_2MgZnSe_4$ |



|                              |                              |                              |                              |
|------------------------------|------------------------------|------------------------------|------------------------------|
| $\text{Na}_2\text{CoGeSe}_4$ | $\text{Ag}_2\text{PdHfS}_4$  | $\text{Fe}_2\text{CoNiO}_4$  | $\text{Zn}_2\text{KInS}_4$   |
| $\text{Na}_2\text{FeHfTe}_4$ | $\text{Na}_2\text{AlSbSe}_4$ | $\text{Ag}_2\text{AlInS}_4$  | $\text{Ag}_2\text{FeCrSe}_4$ |
| $\text{Na}_2\text{NiHfTe}_4$ | $\text{Na}_2\text{GaSbSe}_4$ | $\text{Li}_2\text{PtTiTe}_4$ | $\text{Pd}_2\text{FeNiSe}_4$ |
| $\text{Li}_2\text{AuAlSe}_4$ | $\text{K}_2\text{AlSbSe}_4$  | $\text{Co}_2\text{FeNiO}_4$  | $\text{Ag}_2\text{NiCrSe}_4$ |
| $\text{Li}_2\text{CoTiSe}_4$ | $\text{Li}_2\text{NaNbTe}_4$ | $\text{Pd}_2\text{FeZnS}_4$  | $\text{Co}_2\text{NaGaO}_4$  |
| $\text{Li}_2\text{FeTiSe}_4$ | $\text{K}_2\text{AlSbS}_4$   | $\text{Fe}_2\text{KInS}_4$   | $\text{Ag}_2\text{ZnHfO}_4$  |
| $\text{Na}_2\text{MgTiSe}_4$ | $\text{K}_2\text{InSbSe}_4$  | $\text{Na}_2\text{ZnZrTe}_4$ | $\text{Ag}_2\text{NaMoTe}_4$ |
| $\text{Na}_2\text{FeCrSe}_4$ | $\text{K}_2\text{MgTiTe}_4$  | $\text{Na}_2\text{MgGeTe}_4$ | $\text{Li}_2\text{NiCTe}_4$  |
| $\text{Na}_2\text{FeGeSe}_4$ | $\text{Mg}_2\text{FeNiS}_4$  | $\text{Na}_2\text{AlGaTe}_4$ | $\text{Pt}_2\text{CoNiS}_4$  |
| $\text{Na}_2\text{CoHfTe}_4$ | $\text{Fe}_2\text{LiInO}_4$  | $\text{K}_2\text{ZnCTe}_4$   | $\text{Li}_2\text{FeCTe}_4$  |
| $\text{K}_2\text{PdTiSe}_4$  | $\text{Ag}_2\text{CoCS}_4$   | $\text{Fe}_2\text{KGaO}_4$   | $\text{Fe}_2\text{MgNiTe}_4$ |
| $\text{K}_2\text{AlSbO}_4$   | $\text{Mg}_2\text{FeCoS}_4$  | $\text{Pd}_2\text{CoZnS}_4$  | $\text{Li}_2\text{CoCTe}_4$  |
| $\text{Li}_2\text{PtSiSe}_4$ | $\text{Ag}_2\text{NiCS}_4$   | $\text{Ag}_2\text{FeHfSe}_4$ | $\text{Zn}_2\text{NaInS}_4$  |
| $\text{K}_2\text{CoSnSe}_4$  | $\text{Co}_2\text{KAuO}_4$   | $\text{Pd}_2\text{LiAuO}_4$  | $\text{Li}_2\text{CoSiTe}_4$ |
| $\text{Li}_2\text{MgSnSe}_4$ | $\text{Li}_2\text{KCrTe}_4$  | $\text{Pd}_2\text{MgZnSe}_4$ | $\text{Co}_2\text{MgFeTe}_4$ |
| $\text{K}_2\text{AgCrSe}_4$  | $\text{Na}_2\text{LiCrTe}_4$ | $\text{Ag}_2\text{ZnZrO}_4$  | $\text{Ag}_2\text{LiNbTe}_4$ |
| $\text{Na}_2\text{NiCrSe}_4$ | $\text{Ag}_2\text{MgSiSe}_4$ | $\text{Pd}_2\text{NiZnS}_4$  | $\text{Fe}_2\text{NaAlSe}_4$ |
| $\text{Na}_2\text{CoTiSe}_4$ | $\text{Ag}_2\text{CoCO}_4$   | $\text{Ag}_2\text{CoHfSe}_4$ | $\text{Mg}_2\text{NaGaO}_4$  |
| $\text{Na}_2\text{ZnCrSe}_4$ | $\text{Ag}_2\text{FeCO}_4$   | $\text{Li}_2\text{AgNbTe}_4$ | $\text{Ni}_2\text{KAuSe}_4$  |
| $\text{K}_2\text{FeCSe}_4$   | $\text{Pd}_2\text{NaAlS}_4$  | $\text{K}_2\text{ZnTiTe}_4$  | $\text{Zn}_2\text{KAlSe}_4$  |
| $\text{Na}_2\text{FeTiSe}_4$ | $\text{Na}_2\text{AuSbSe}_4$ | $\text{Pd}_2\text{KGaO}_4$   | $\text{Fe}_2\text{KAlSe}_4$  |
| $\text{Li}_2\text{NiTiSe}_4$ | $\text{Ag}_2\text{PdZrO}_4$  | $\text{Ag}_2\text{MgCSe}_4$  | $\text{Mg}_2\text{KGaO}_4$   |
| $\text{K}_2\text{PtZrS}_4$   | $\text{Na}_2\text{PdSiTe}_4$ | $\text{Fe}_2\text{NaGaO}_4$  | $\text{Pt}_2\text{FeNiS}_4$  |
| $\text{Na}_2\text{MgSnSe}_4$ | $\text{Ag}_2\text{NiCO}_4$   | $\text{Fe}_2\text{LiGaO}_4$  | $\text{Ag}_2\text{NaNbTe}_4$ |
| $\text{Li}_2\text{MgCSe}_4$  | $\text{Li}_2\text{MgZrTe}_4$ | $\text{Zn}_2\text{CoNiS}_4$  | $\text{Na}_2\text{ZnSnTe}_4$ |
| $\text{K}_2\text{FeSnSe}_4$  | $\text{Pd}_2\text{MgNiO}_4$  | $\text{Ag}_2\text{KNbTe}_4$  | $\text{Mg}_2\text{FeCoTe}_4$ |
| $\text{Na}_2\text{NiTiSe}_4$ | $\text{Ag}_2\text{CoHfS}_4$  | $\text{Zn}_2\text{NaAlS}_4$  | $\text{Ni}_2\text{MgFeSe}_4$ |
| $\text{Na}_2\text{PtTiS}_4$  | $\text{K}_2\text{GaSbS}_4$   | $\text{Na}_2\text{PtHfTe}_4$ | $\text{Co}_2\text{MgNiSe}_4$ |
| $\text{Li}_2\text{MgTiSe}_4$ | $\text{Ag}_2\text{FeHfS}_4$  | $\text{Fe}_2\text{LiGaS}_4$  | $\text{Co}_2\text{KGaO}_4$   |

|                              |                              |                              |                              |
|------------------------------|------------------------------|------------------------------|------------------------------|
| $\text{Ag}_2\text{KMoS}_4$   | $\text{Pd}_2\text{AgGaO}_4$  | $\text{Fe}_2\text{MgZnO}_4$  | $\text{Na}_2\text{ZnTiTe}_4$ |
| $\text{K}_2\text{ZnTiSe}_4$  | $\text{Ag}_2\text{PdGeO}_4$  | $\text{Ag}_2\text{PdHfSe}_4$ | $\text{Mg}_2\text{FeNiTe}_4$ |
| $\text{K}_2\text{ZnSnSe}_4$  | $\text{Fe}_2\text{KInO}_4$   | $\text{Ag}_2\text{FeGeS}_4$  | $\text{Pd}_2\text{FeZnSe}_4$ |
| $\text{Li}_2\text{GaInSe}_4$ | $\text{Fe}_2\text{NaAuS}_4$  | $\text{Ag}_2\text{NiHfSe}_4$ | $\text{Zn}_2\text{NaAlO}_4$  |
| $\text{Na}_2\text{PdSnSe}_4$ | $\text{Pd}_2\text{MgCoO}_4$  | $\text{Fe}_2\text{KAlO}_4$   | $\text{Pd}_2\text{CoNiSe}_4$ |
| $\text{Na}_2\text{MgCSe}_4$  | $\text{Mg}_2\text{CoNiO}_4$  | $\text{Ag}_2\text{ZnHfSe}_4$ | $\text{Co}_2\text{NaInO}_4$  |
| $\text{Na}_2\text{AuAlSe}_4$ | $\text{Ag}_2\text{PdCrS}_4$  | $\text{Zn}_2\text{FeNiS}_4$  | $\text{Fe}_2\text{NaSbS}_4$  |
| $\text{K}_2\text{GaSbO}_4$   | $\text{Mg}_2\text{FeNiO}_4$  | $\text{Mg}_2\text{KAlS}_4$   | $\text{Na}_2\text{ZnCTe}_4$  |
| $\text{Na}_2\text{PtCSe}_4$  | $\text{Ag}_2\text{NiSiO}_4$  | $\text{Ni}_2\text{CoZnS}_4$  | $\text{Fe}_2\text{KAlTe}_4$  |
| $\text{Na}_2\text{PtSiSe}_4$ | $\text{Mg}_2\text{FeCoO}_4$  | $\text{Pd}_2\text{NaGaSe}_4$ | $\text{Ni}_2\text{MgCoSe}_4$ |
| $\text{Na}_2\text{GaInSe}_4$ | $\text{Pd}_2\text{MgFeO}_4$  | $\text{Zn}_2\text{FeCoS}_4$  | $\text{Ni}_2\text{LiAuSe}_4$ |
| $\text{Li}_2\text{AuGaSe}_4$ | $\text{Ag}_2\text{CoSiO}_4$  | $\text{Zn}_2\text{MgPdSe}_4$ | $\text{Co}_2\text{PdPtS}_4$  |
| $\text{Na}_2\text{InSbO}_4$  | $\text{K}_2\text{GaSbSe}_4$  | $\text{Co}_2\text{NiZnS}_4$  | $\text{Zn}_2\text{LiGaO}_4$  |
| $\text{Li}_2\text{MgHfTe}_4$ | $\text{Li}_2\text{GaSbSe}_4$ | $\text{Ni}_2\text{FeZnS}_4$  | $\text{Fe}_2\text{PtZnS}_4$  |
| $\text{K}_2\text{PtTiS}_4$   | $\text{Ag}_2\text{FeSiO}_4$  | $\text{K}_2\text{AuInTe}_4$  | $\text{Ni}_2\text{CoPtS}_4$  |
| $\text{Na}_2\text{NiSnSe}_4$ | $\text{Ag}_2\text{MgCrO}_4$  | $\text{Co}_2\text{NaAlO}_4$  | $\text{Ni}_2\text{NaAuSe}_4$ |
| $\text{Li}_2\text{PtHfSe}_4$ | $\text{Ag}_2\text{PdTiS}_4$  | $\text{Ag}_2\text{PdCSe}_4$  | $\text{Li}_2\text{NiSiTe}_4$ |
| $\text{Ag}_2\text{MgSiS}_4$  | $\text{Ag}_2\text{PdTiO}_4$  | $\text{Li}_2\text{PdZrTe}_4$ | $\text{Pt}_2\text{KAuS}_4$   |
| $\text{Li}_2\text{PtGeSe}_4$ | $\text{Pd}_2\text{AgAlSe}_4$ | $\text{Mg}_2\text{KGaS}_4$   | $\text{Pd}_2\text{KAuS}_4$   |
| $\text{Na}_2\text{PdHfTe}_4$ | $\text{K}_2\text{ZnGeTe}_4$  | $\text{Fe}_2\text{NiZnS}_4$  | $\text{Co}_2\text{KInO}_4$   |
| $\text{Li}_2\text{NiSnSe}_4$ | $\text{Pd}_2\text{NaGaS}_4$  | $\text{Co}_2\text{FeZnS}_4$  | $\text{Pd}_2\text{FePtS}_4$  |
| $\text{Ag}_2\text{NaMoS}_4$  | $\text{K}_2\text{MgSnTe}_4$  | $\text{Pd}_2\text{NaGaO}_4$  | $\text{Fe}_2\text{CoPdSe}_4$ |
| $\text{Li}_2\text{FeSnSe}_4$ | $\text{Fe}_2\text{MgCoS}_4$  | $\text{Li}_2\text{ZnZrTe}_4$ | $\text{Fe}_2\text{AgAuS}_4$  |
| $\text{Li}_2\text{AlSbS}_4$  | $\text{Co}_2\text{MgFeO}_4$  | $\text{Ag}_2\text{NiGeS}_4$  | $\text{Pd}_2\text{CoPtS}_4$  |
| $\text{K}_2\text{NaCrTe}_4$  | $\text{Mg}_2\text{FePdSe}_4$ | $\text{Pd}_2\text{LiAlSe}_4$ | $\text{Ag}_2\text{MgZrTe}_4$ |
| $\text{Na}_2\text{KNbTe}_4$  | $\text{Co}_2\text{LiAuSe}_4$ | $\text{Ag}_2\text{CoGeS}_4$  | $\text{Pd}_2\text{AgGaSe}_4$ |
| $\text{Ag}_2\text{KNbS}_4$   | $\text{Mg}_2\text{AgGaSe}_4$ | $\text{Fe}_2\text{LiAlO}_4$  | $\text{Ag}_2\text{PdGeSe}_4$ |
| $\text{Na}_2\text{FeSnSe}_4$ | $\text{Pd}_2\text{FeNiO}_4$  | $\text{Mg}_2\text{AgInS}_4$  | $\text{Fe}_2\text{NiPdSe}_4$ |
| $\text{K}_2\text{LiNbTe}_4$  | $\text{Pd}_2\text{FeZnO}_4$  | $\text{Fe}_2\text{CoZnS}_4$  | $\text{Co}_2\text{NaGaSe}_4$ |

|                              |                              |                              |                              |
|------------------------------|------------------------------|------------------------------|------------------------------|
| $\text{Li}_2\text{CoSnSe}_4$ | $\text{Mg}_2\text{CoPdSe}_4$ | $\text{Co}_2\text{KInSe}_4$  | $\text{Ni}_2\text{FePtS}_4$  |
| $\text{Li}_2\text{PtSnSe}_4$ | $\text{Ag}_2\text{NiCrO}_4$  | $\text{Li}_2\text{AgMoTe}_4$ | $\text{Pd}_2\text{NaAuS}_4$  |
| $\text{Li}_2\text{AuInSe}_4$ | $\text{Fe}_2\text{LiInS}_4$  | $\text{Na}_2\text{AlInTe}_4$ | $\text{Co}_2\text{FePdSe}_4$ |
| $\text{Na}_2\text{PtHfSe}_4$ | $\text{Mg}_2\text{PdZnSe}_4$ | $\text{Co}_2\text{NaInSe}_4$ | $\text{Ag}_2\text{FeGeSe}_4$ |
| $\text{Ag}_2\text{MgHfS}_4$  | $\text{Mg}_2\text{NiPdSe}_4$ | $\text{Co}_2\text{MgZnO}_4$  | $\text{Ag}_2\text{CoGeSe}_4$ |
| $\text{Na}_2\text{CoSnSe}_4$ | $\text{Pd}_2\text{CoZnO}_4$  | $\text{Na}_2\text{MgTiTe}_4$ | $\text{Mg}_2\text{NaInSe}_4$ |
| $\text{Li}_2\text{PdSnSe}_4$ | $\text{Mg}_2\text{AgAlSe}_4$ | $\text{Li}_2\text{FeSnTe}_4$ | $\text{Mg}_2\text{AgInSe}_4$ |
| $\text{Na}_2\text{AlSbS}_4$  | $\text{Fe}_2\text{MgNiO}_4$  | $\text{Fe}_2\text{NaAlO}_4$  | $\text{Pd}_2\text{CoZnSe}_4$ |
| $\text{K}_2\text{AuAlSe}_4$  | $\text{K}_2\text{PtZrSe}_4$  | $\text{Li}_2\text{NiZrTe}_4$ | $\text{Co}_2\text{MgZnSe}_4$ |
| $\text{Ag}_2\text{KCrS}_4$   | $\text{Ni}_2\text{MgFeS}_4$  | $\text{Co}_2\text{NaInS}_4$  | $\text{Co}_2\text{NiPtS}_4$  |
| $\text{K}_2\text{PtSiSe}_4$  | $\text{Pd}_2\text{MgZnO}_4$  | $\text{Zn}_2\text{AgGaS}_4$  | $\text{Pt}_2\text{FePdS}_4$  |
| $\text{K}_2\text{NiHfTe}_4$  | $\text{Pd}_2\text{NiZnO}_4$  | $\text{Li}_2\text{PdTiTe}_4$ | $\text{Pd}_2\text{NiZnSe}_4$ |
| $\text{Li}_2\text{GaSbS}_4$  | $\text{Co}_2\text{NaAuO}_4$  | $\text{Zn}_2\text{KGaS}_4$   | $\text{Fe}_2\text{MgPdTe}_4$ |
| $\text{K}_2\text{LiMoTe}_4$  | $\text{Ag}_2\text{ZnCrO}_4$  | $\text{Li}_2\text{AlInTe}_4$ | $\text{Pt}_2\text{FeCoS}_4$  |
| $\text{K}_2\text{ZnHfTe}_4$  | $\text{Pd}_2\text{LiGaS}_4$  | $\text{Ag}_2\text{FeCSe}_4$  | $\text{Fe}_2\text{LiGaSe}_4$ |
| $\text{Ag}_2\text{MgZrS}_4$  | $\text{Fe}_2\text{MgNiS}_4$  | $\text{Li}_2\text{PdCrTe}_4$ | $\text{Ni}_2\text{FePdSe}_4$ |
| $\text{K}_2\text{PtCSe}_4$   | $\text{Ag}_2\text{PdSiSe}_4$ | $\text{Zn}_2\text{NaGaS}_4$  | $\text{Mg}_2\text{KInS}_4$   |
| $\text{K}_2\text{CoHfTe}_4$  | $\text{Co}_2\text{MgNiS}_4$  | $\text{Co}_2\text{LiAlS}_4$  | $\text{Co}_2\text{LiGaSe}_4$ |
| $\text{K}_2\text{PdHfTe}_4$  | $\text{Ni}_2\text{MgCoS}_4$  | $\text{Ni}_2\text{KInS}_4$   | $\text{Zn}_2\text{KAlO}_4$   |
| $\text{K}_2\text{InSbO}_4$   | $\text{Pd}_2\text{LiAlO}_4$  | $\text{Mg}_2\text{FeZnSe}_4$ | $\text{Mg}_2\text{FePdTe}_4$ |
| $\text{K}_2\text{FeHfTe}_4$  | $\text{Na}_2\text{FeZrTe}_4$ | $\text{Li}_2\text{AgCrTe}_4$ | $\text{Mg}_2\text{NaAlSe}_4$ |
| $\text{Na}_2\text{PtSnSe}_4$ | $\text{Na}_2\text{NiZrTe}_4$ | $\text{Mg}_2\text{CoNiSe}_4$ | $\text{Fe}_2\text{NaGaSe}_4$ |
| $\text{Na}_2\text{ZnHfTe}_4$ | $\text{Na}_2\text{CoSiTe}_4$ | $\text{Zn}_2\text{LiGaS}_4$  | $\text{Zn}_2\text{LiInS}_4$  |
| $\text{Li}_2\text{ZnTiSe}_4$ | $\text{Na}_2\text{NiSiTe}_4$ | $\text{Li}_2\text{FeZrTe}_4$ | $\text{Co}_2\text{NiPdSe}_4$ |
| $\text{Na}_2\text{AuInSe}_4$ | $\text{Pd}_2\text{KAlS}_4$   | $\text{Fe}_2\text{KSbS}_4$   | $\text{Li}_2\text{ZnTiTe}_4$ |
| $\text{Na}_2\text{ZnTiSe}_4$ | $\text{Pd}_2\text{CoNiO}_4$  | $\text{Li}_2\text{PdSiTe}_4$ | $\text{Pd}_2\text{KSbS}_4$   |
| $\text{Na}_2\text{KMoTe}_4$  | $\text{K}_2\text{ZnZrTe}_4$  | $\text{Ni}_2\text{LiAlS}_4$  | $\text{Ag}_2\text{NiTiSe}_4$ |
| $\text{Na}_2\text{PtGeSe}_4$ | $\text{Na}_2\text{CoZrTe}_4$ | $\text{Li}_2\text{CoSnTe}_4$ | $\text{Ni}_2\text{NaAlSe}_4$ |
| $\text{Na}_2\text{AuGaSe}_4$ | $\text{Ag}_2\text{MgHfO}_4$  | $\text{Mg}_2\text{FeNiSe}_4$ | $\text{Ag}_2\text{FeTiSe}_4$ |

|                              |                              |                              |                              |
|------------------------------|------------------------------|------------------------------|------------------------------|
| $\text{Ag}_2\text{NaMoSe}_4$ | $\text{Fe}_2\text{MgCoO}_4$  | $\text{Mg}_2\text{FeCoSe}_4$ | $\text{Zn}_2\text{MgFeSe}_4$ |
| $\text{Li}_2\text{ZnSnSe}_4$ | $\text{Co}_2\text{MgFeS}_4$  | $\text{Na}_2\text{AuInTe}_4$ | $\text{Ag}_2\text{PtHfS}_4$  |
| $\text{Ag}_2\text{NaNbS}_4$  | $\text{Co}_2\text{LiAuO}_4$  | $\text{Na}_2\text{PtSnTe}_4$ | $\text{Ag}_2\text{CoTiSe}_4$ |
| $\text{K}_2\text{PtHfSe}_4$  | $\text{Na}_2\text{FeSiTe}_4$ | $\text{Ni}_2\text{NaInS}_4$  | $\text{Pd}_2\text{KInO}_4$   |
| $\text{Ag}_2\text{KMoO}_4$   | $\text{Co}_2\text{FePdS}_4$  | $\text{Ag}_2\text{CoCSe}_4$  | $\text{Ag}_2\text{NiGeSe}_4$ |
| $\text{Ag}_2\text{NaCrS}_4$  | $\text{Fe}_2\text{NiPdS}_4$  | $\text{Li}_2\text{MgSnTe}_4$ | $\text{Ni}_2\text{LiInSe}_4$ |
| $\text{K}_2\text{MgZrTe}_4$  | $\text{K}_2\text{AgNbTe}_4$  | $\text{Li}_2\text{ZnSiTe}_4$ | $\text{Fe}_2\text{KAuTe}_4$  |
| $\text{K}_2\text{ZnSiTe}_4$  | $\text{Ni}_2\text{FePdS}_4$  | $\text{Mg}_2\text{CoZnSe}_4$ | $\text{Ni}_2\text{NaInSe}_4$ |
| $\text{Li}_2\text{InSbS}_4$  | $\text{Pd}_2\text{NaAlO}_4$  | $\text{Mg}_2\text{NiZnSe}_4$ | $\text{Pt}_2\text{NaAuSe}_4$ |
| $\text{Li}_2\text{NiHfTe}_4$ | $\text{Co}_2\text{NiPdS}_4$  | $\text{Mg}_2\text{LiAlS}_4$  | $\text{Ni}_2\text{KAlSe}_4$  |
| $\text{K}_2\text{AuInSe}_4$  | $\text{Ag}_2\text{PdZrS}_4$  | $\text{Ni}_2\text{MgZnO}_4$  | $\text{Pd}_2\text{NaAuSe}_4$ |
| $\text{Ag}_2\text{KCrSe}_4$  | $\text{K}_2\text{CoZrTe}_4$  | $\text{Pd}_2\text{LiInS}_4$  | $\text{Pd}_2\text{NaInO}_4$  |
| $\text{Ag}_2\text{LiMoS}_4$  | $\text{K}_2\text{NiZrTe}_4$  | $\text{Ag}_2\text{NiCSe}_4$  | $\text{Pt}_2\text{KAuSe}_4$  |
| $\text{Ag}_2\text{KNbO}_4$   | $\text{Na}_2\text{AgNbTe}_4$ | $\text{Ni}_2\text{LiAlO}_4$  | $\text{Ni}_2\text{MgZnSe}_4$ |
| $\text{Li}_2\text{FeHfTe}_4$ | $\text{K}_2\text{PdZrTe}_4$  | $\text{Zn}_2\text{MgFeO}_4$  | $\text{Fe}_2\text{LiSbS}_4$  |
| $\text{K}_2\text{PtSnSe}_4$  | $\text{K}_2\text{AgMoTe}_4$  | $\text{Li}_2\text{NiSnTe}_4$ | $\text{Fe}_2\text{PdZnSe}_4$ |
| $\text{Li}_2\text{CoHfTe}_4$ | $\text{Ag}_2\text{NiZrS}_4$  | $\text{Li}_2\text{CoZrTe}_4$ | $\text{Pt}_2\text{NaAuS}_4$  |
| $\text{Zn}_2\text{MgPdO}_4$  | $\text{Ag}_2\text{CoZrS}_4$  | $\text{Fe}_2\text{NaInSe}_4$ | $\text{Fe}_2\text{AgAlTe}_4$ |
| $\text{Li}_2\text{KNbTe}_4$  | $\text{Fe}_2\text{AgAlSe}_4$ | $\text{Pd}_2\text{LiGaSe}_4$ | $\text{Pd}_2\text{LiAuSe}_4$ |
| $\text{Na}_2\text{LiNbTe}_4$ | $\text{Ag}_2\text{ZnCS}_4$   | $\text{Li}_2\text{MgGeTe}_4$ | $\text{Ag}_2\text{GaInS}_4$  |

# Supplementary Figures

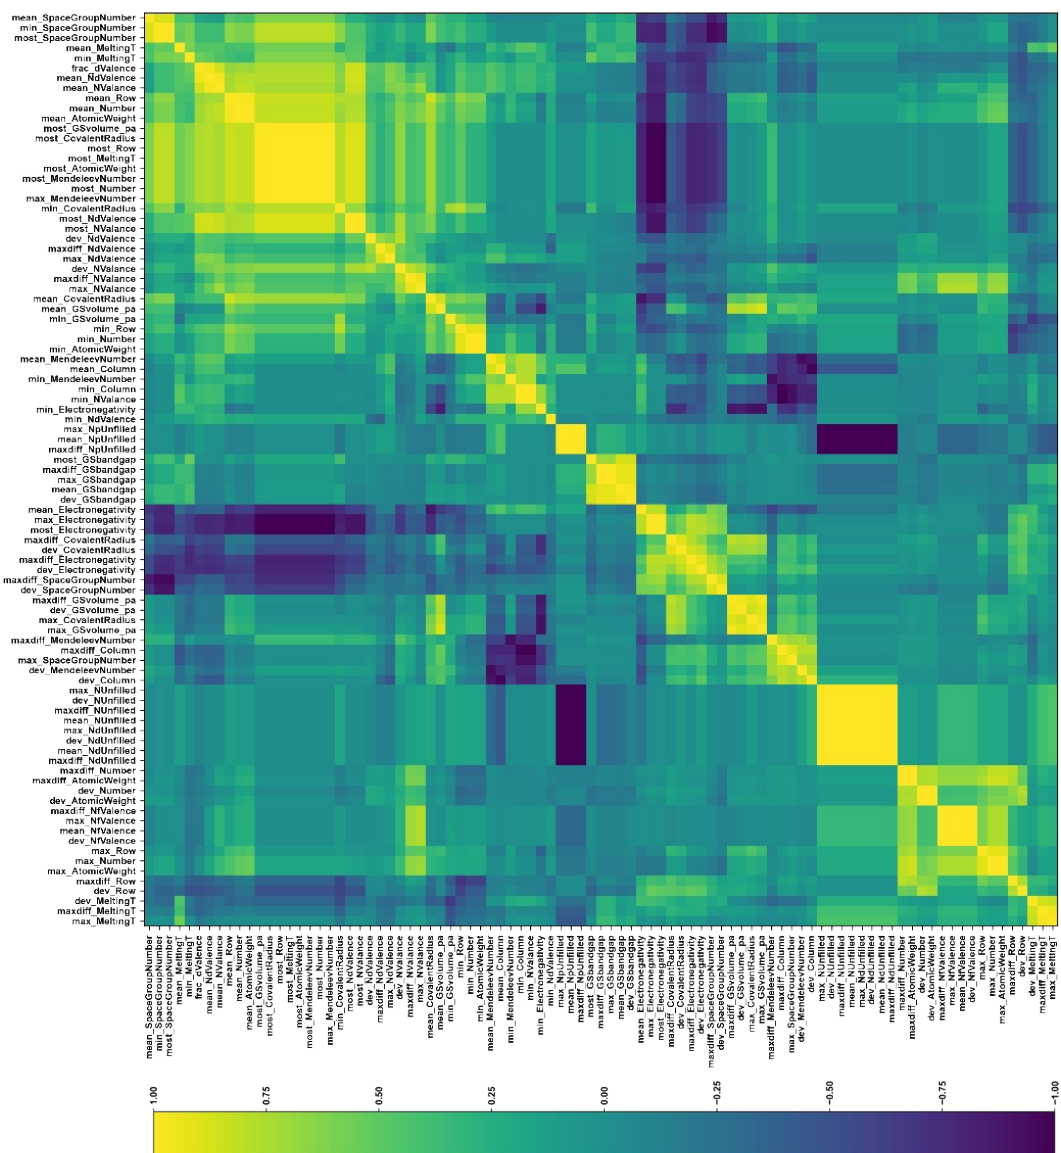

**Fig. S1.** The Person correlation heat map of the initial 145 feature descriptors. The numbers in the heat map represent the correlations among these features. Yellow represents positive correlations, and purple represents negative correlations. The features with an absolute correlation value greater than 0.8 and low rank of importance were deleted.

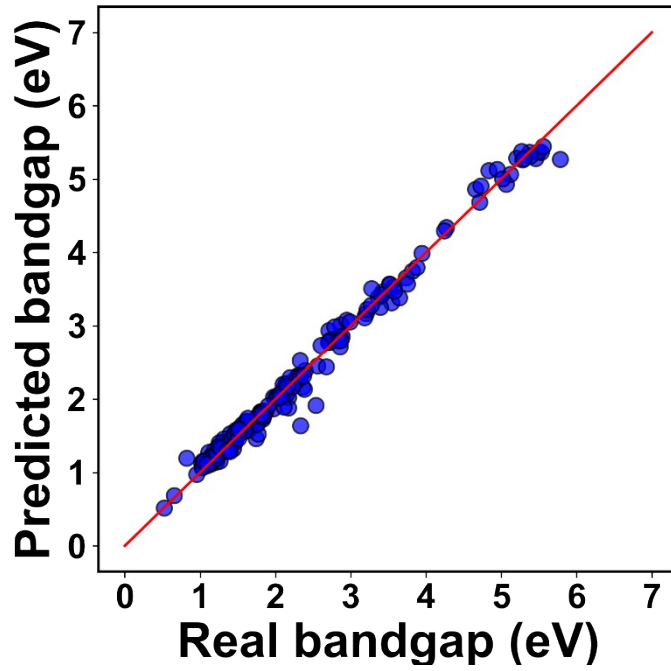

**Fig. S2.** Validation set fitting results of the bandgaps predicted by ML and real DFT calculations searched by literatures.

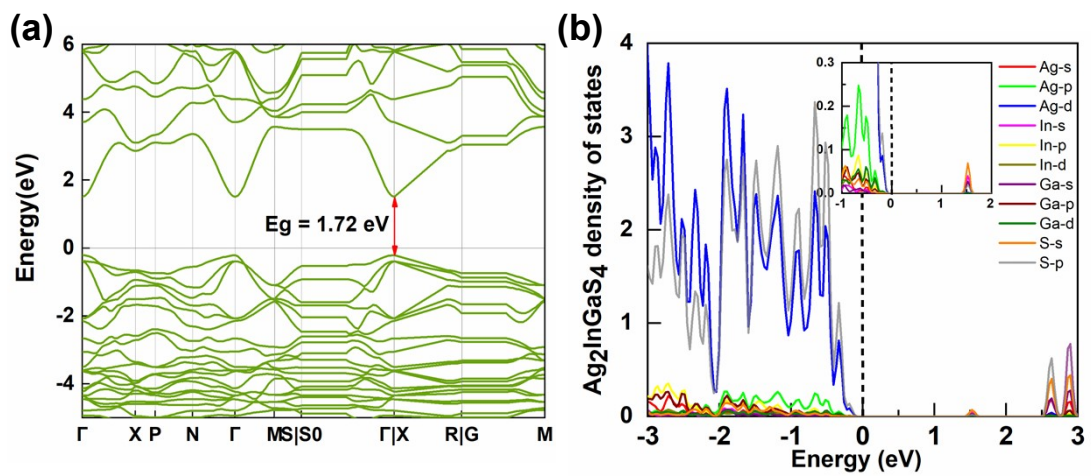

**Fig. S3.** DFT calculation results for  $\text{Ag}_2\text{InGaS}_4$ . (a) The electronic band structure calculated with HSE and (b) the Projected density of states for  $\text{Ag}_2\text{InGaS}_4$ .

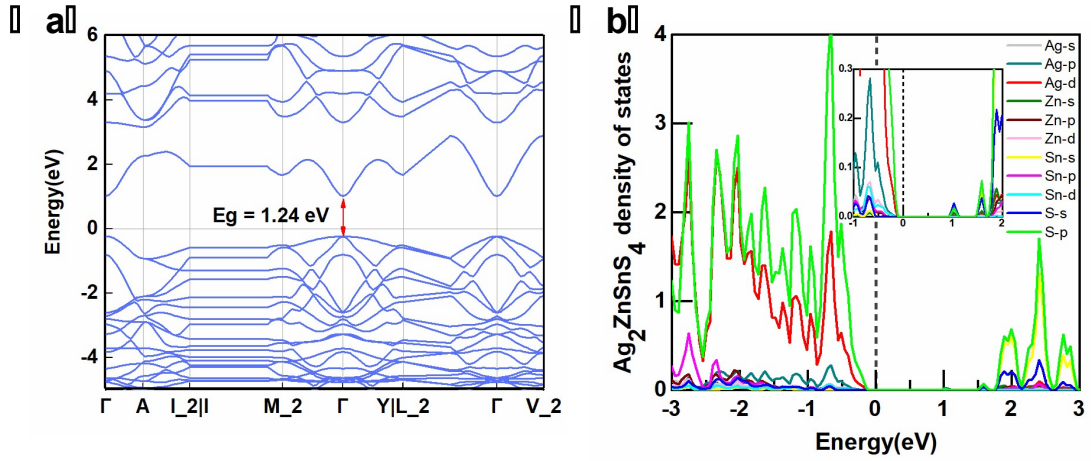

**Fig. S4.** DFT calculation results for  $\text{Ag}_2\text{ZnSnS}_4$ . (a) The electronic band structure calculated with HSE and (b) the Projected density of states for  $\text{Ag}_2\text{ZnSnS}_4$ .

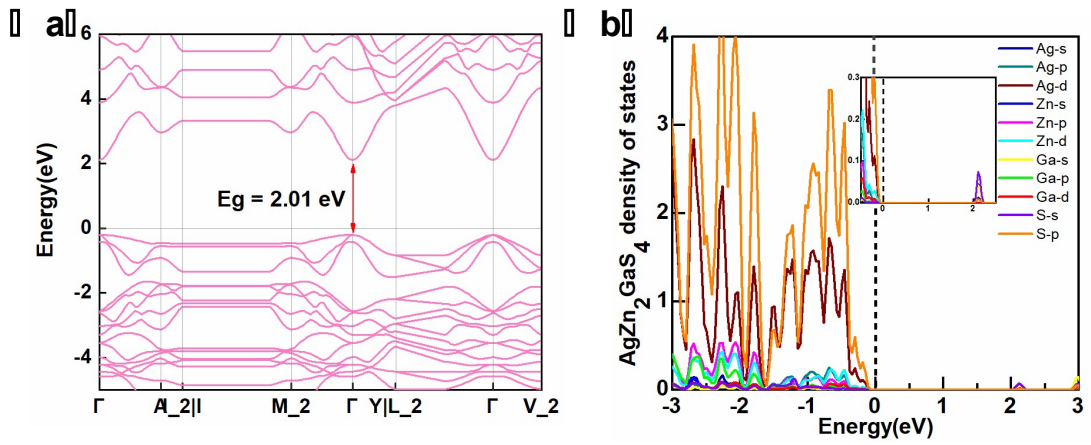

**Fig. S5.** DFT calculation results for  $\text{AgZn}_2\text{GaS}_4$ . (a) The electronic band structure calculated with HSE and (b) the Projected density of states for  $\text{AgZn}_2\text{GaS}_4$ .

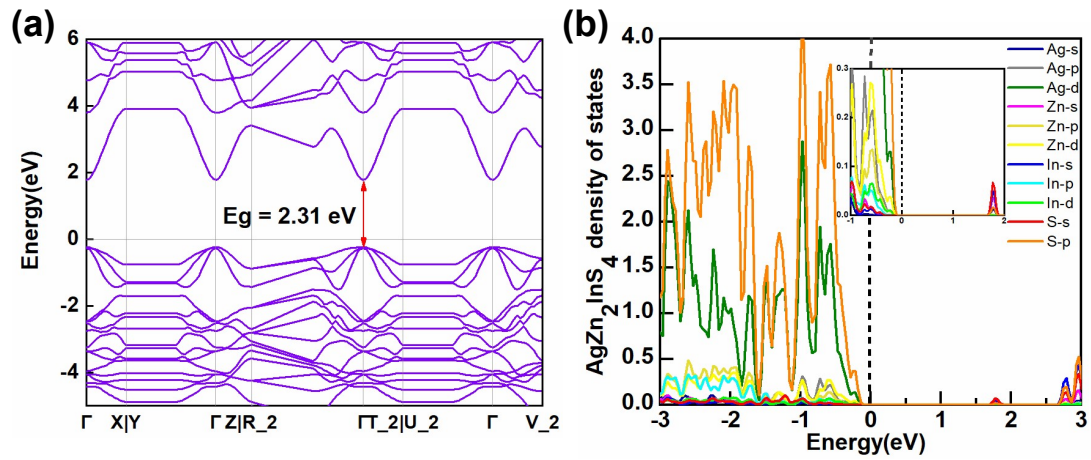

**Fig. S6.** DFT calculation results for  $\text{AgZn}_2\text{InS}_4$ . (a) The electronic band structure calculated with HSE and (b) the Projected density of states for  $\text{AgZn}_2\text{InS}_4$ .

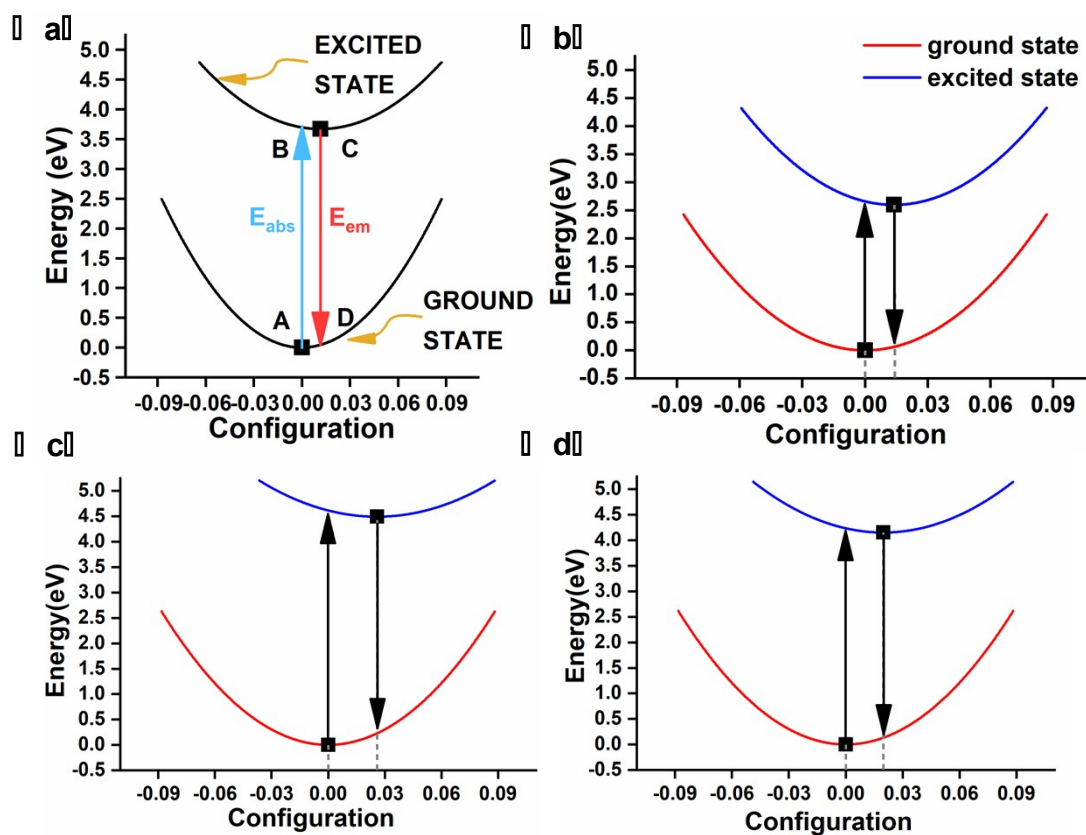

**Fig. S7.** The configuration coordinate diagram describing the luminescence center of (a)  $\text{Ag}_2\text{InGaS}_4$ , (b)  $\text{Ag}_2\text{ZnSnS}_4$ , (c)  $\text{AgZn}_2\text{GaS}_4$ , (d)  $\text{AgZn}_2\text{InS}_4$ .
